# Supplementary material for: CD38‐NADase is a new major contributor to Duchenne muscular dystrophic phenotype
Source: PubMed Central journal article supplement (PMC9081905; doi:10.15252/emmm.202012860), 2022-03-17
Supplement: EMMM-14-e12860-s005.pdf [file EMMM-14-e12860-s005.pdf]

**Appendix Figure S1.** CD38 expression, NAD<sup>+</sup> metabolites and related enzymes in *mdx/CD38<sup>-/-</sup>* mice.

**Appendix Figure S2.** NAD<sup>+</sup> metabolism changes in *WT* and *WT/CD38<sup>-/-</sup>* mice.

**Appendix Figure S3.** Cardiac function of *WT* and *WT/CD38<sup>-/-</sup>* mice.

**Appendix Figure S4.** Respiratory function and diaphragm structure of *WT* and *WT/CD38<sup>-/-</sup>* mice.

**Appendix Figure S5.** Deletion of CD38 has no effect on cell infiltrations and inflammation markers in diaphragm of *WT/CD38<sup>-/-</sup>* mice.

**Appendix Figure S6.** Effect of CD38 deletion on skeletal muscle structure and function in *WT/CD38<sup>-/-</sup>* mice.

**Appendix Figure S7.** Pharmacological effects on CD38 inhibitors on *WT* mice and human myotubes. Cellular distribution of CD38 in *mdx* mice.

**Appendix Figure S8.** Histological evaluation of systemic toxicity of K-rhein in *mdx* mice treated for 5 weeks (5mg/kg/d). Staining was performed with the saffron eosin hemalun method.

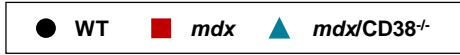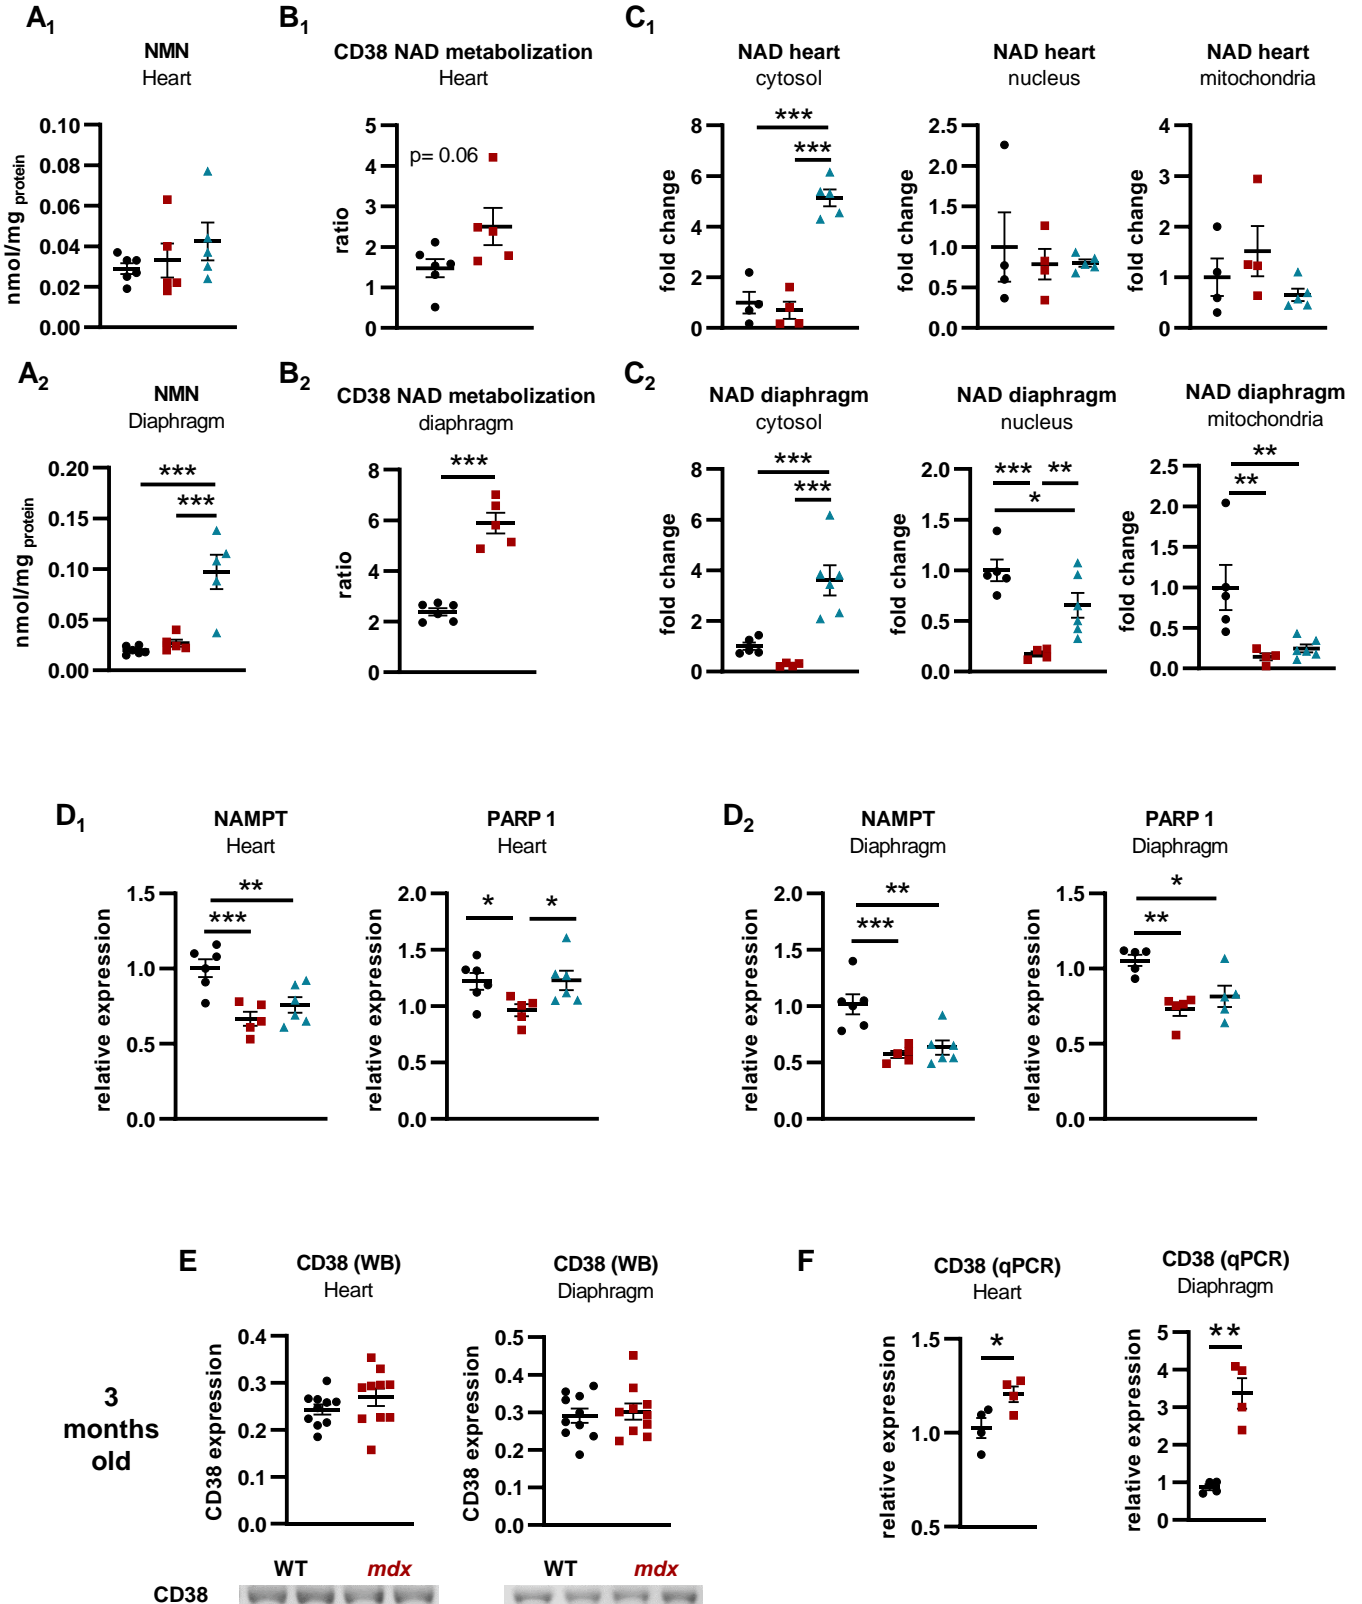

Appendix Figure S1

**Appendix Figure S1. CD38 expression, NAD<sup>+</sup> metabolites and related enzymes in *mdx/CD38<sup>-/-</sup>* mice.**

- A1, A2** Dot plots showing nicotinamide mononucleotide (NMN) levels in heart (**A1**) and diaphragm (**A2**) of WT (n=6), *mdx* (n=5) and *mdx/CD38<sup>-/-</sup>* (n=5) mice.
- B1, B2** Dot plots showing NAD<sup>+</sup> metabolization by CD38 in the heart (**B1**) and diaphragm (**B2**) of WT and *mdx* mice calculated by dividing the NAD<sup>+</sup> values obtained respectively in *WT/CD38<sup>-/-</sup>* and in *mdx/CD38<sup>-/-</sup>* mice by the NAD<sup>+</sup> values obtained respectively in WT (n=6) and *mdx* mice (n=5).
- C1, C2** Subcellular distribution of NAD<sup>+</sup> levels in isolated cardiomyocytes (**C1**) and in the diaphragm (**C2**) of WT (n=4 and 5, respectively), *mdx* (n=4) and *mdx/CD38<sup>-/-</sup>* (n=5 and 6, respectively) mice following cell fractionation procedure. The upper panel shows dot plots of cardiomyocyte NAD<sup>+</sup> levels in the cytosolic, nuclear and mitochondria fractions. The lower panel shows dot plots of diaphragm NAD<sup>+</sup> levels in the cytosolic, nuclear and mitochondria fractions.
- D1, D2** Relative mRNA expression, evaluated by qPCR, of nicotinamide phosphoribosyltransferase (NAMPT) and poly-ADP-ribose polymerase 1 (PARP 1) in the heart (**D1**) and the diaphragm (**D2**) of WT (n=6, excepted for PARP 1 in the diaphragm n=5), *mdx* (n=5) and *mdx/CD38<sup>-/-</sup>* (n=6, excepted PARP 1 in the diaphragm n=5) mice.
- E** Western blot (WB) analysis of CD38 protein expression in the heart and diaphragm of 3-month-old WT and *mdx* mice (n=10 per group). Total protein measurement was used for normalization.
- F** qPCR analysis of the CD38 mRNA levels in the heart and diaphragm of 3-month-old WT and *mdx* mice (n=4 per group).

**Data information: A,B,C,D,F** Each dot of the graph represents a mouse and measured in duplicate, graph **E** one value/mouse. After normality and variance comparison tests, significance was assessed using: **A1, C1**: ANOVA; **A2, C1 (cytosol), C2, D1, D2** NAMPT: ANOVA followed by Fisher's LSD test; **B1-2, E, F** Heart: unpaired Student's t-test; **D2** PARP 1: Kruskal-Wallis followed by Dunn's tests; **F** Diaphragm: unpaired Student's t-test with Welch's correction. Values are expressed as means ± SEM. Significance: \*p<0.05, \*\*p<0.01, \*\*\*p<0.001.

■ WT    ■ WT/CD38<sup>-/-</sup>

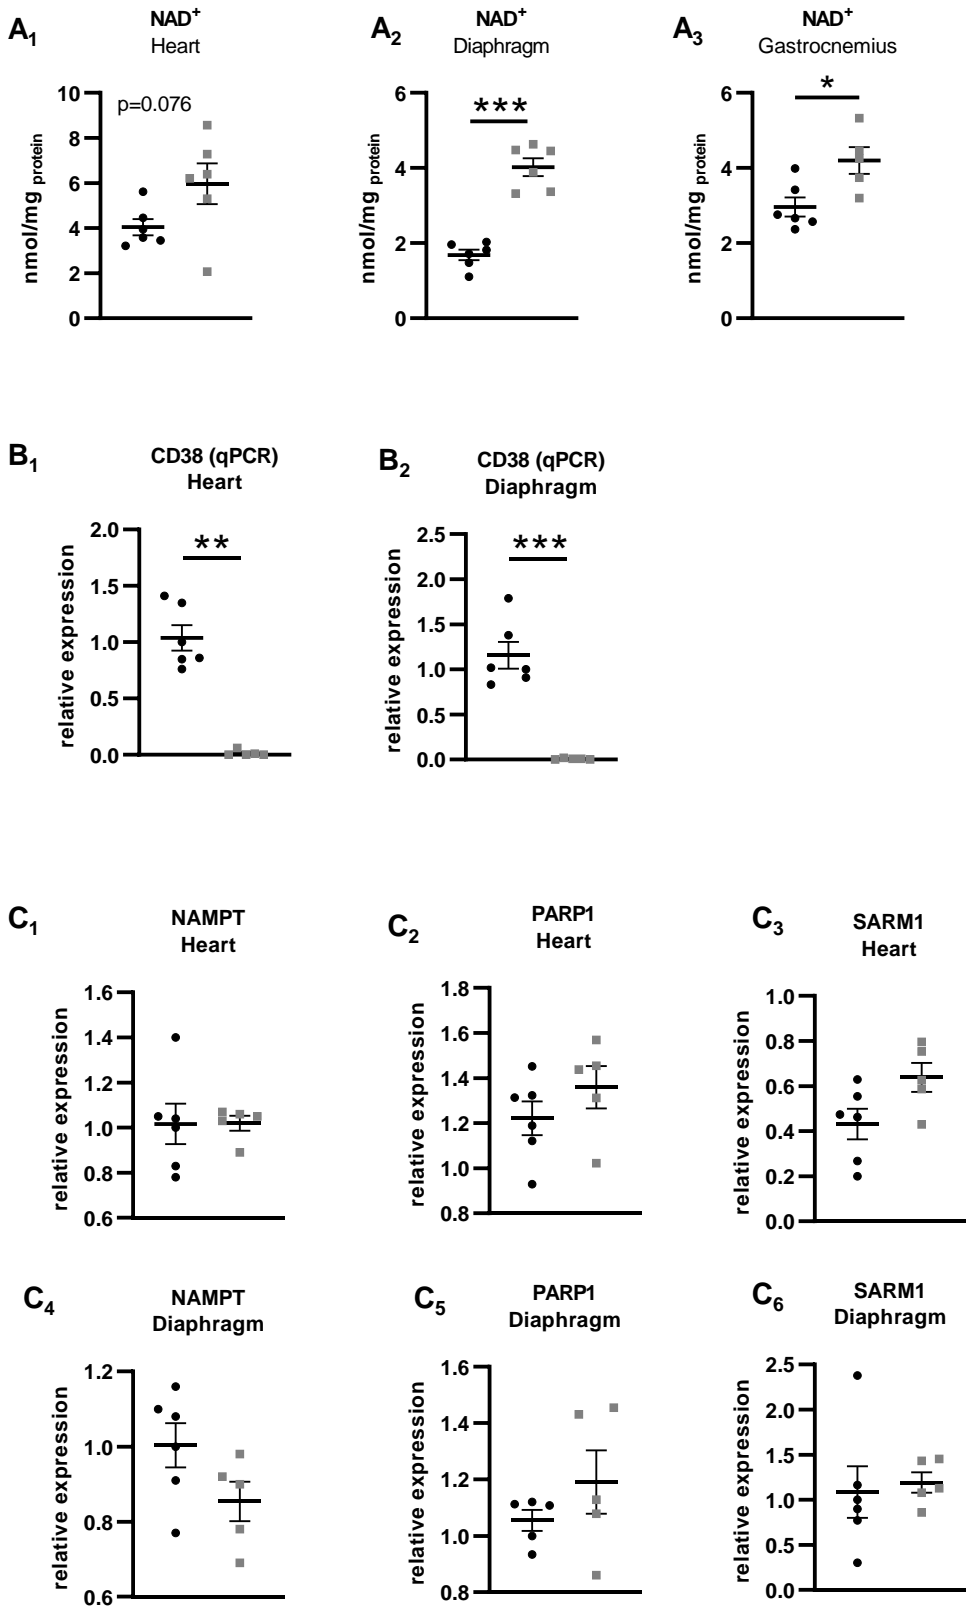

Appendix Figure S2

**Appendix Figure S2. NAD<sup>+</sup> metabolism changes in WT and WT/CD38<sup>-/-</sup> mice.**

- A** Measurements of NAD<sup>+</sup> levels in WT and WT/CD38<sup>-/-</sup> mice: heart and diaphragm (n=6 mice per group) and gastrocnemius (n=6 and n=5 mice, respectively).
- B** Checking of the absence of CD38 in WT/CD38<sup>-/-</sup> mice (n=6 WT and n=5 WT/CD38<sup>-/-</sup> mice).
- C** Relative expression, evaluated by qPCR, of nicotinamide phosphoribosyltransferase (NAMPT), poly-ADP-ribose polymerase 1 (PARP1) and sterile alpha and Toll/interleukin-1 receptor motif-containing 1 (SARM1) in the heart (**C**<sub>1</sub>, **C**<sub>2</sub>, **C**<sub>3</sub>) and diaphragm (**C**<sub>4</sub>, **C**<sub>5</sub>, **C**<sub>6</sub>) of WT and WT/CD38<sup>-/-</sup> mice (n= 6 WT and n=5 WT/CD38<sup>-/-</sup> mice per group excepted **C**<sub>5</sub> n= 5 WT).

**Data information:** Each dot of the graphs represents a mouse and measured in duplicate. After normality and variance comparison tests, significance was assessed using: A, **C**<sub>2-6</sub>: unpaired Student's t-test, **C**<sub>1</sub>, **B**<sub>1</sub>: Mann-Whitney test; **B**<sub>2</sub>: Unpaired t test with Welch's correction. Values are expressed as means ± SEM. Significance: \*p<0.05, \*\*p<0.01, \*\*\*p<0.001.

■ WT    ■ WT/CD38<sup>-/-</sup>

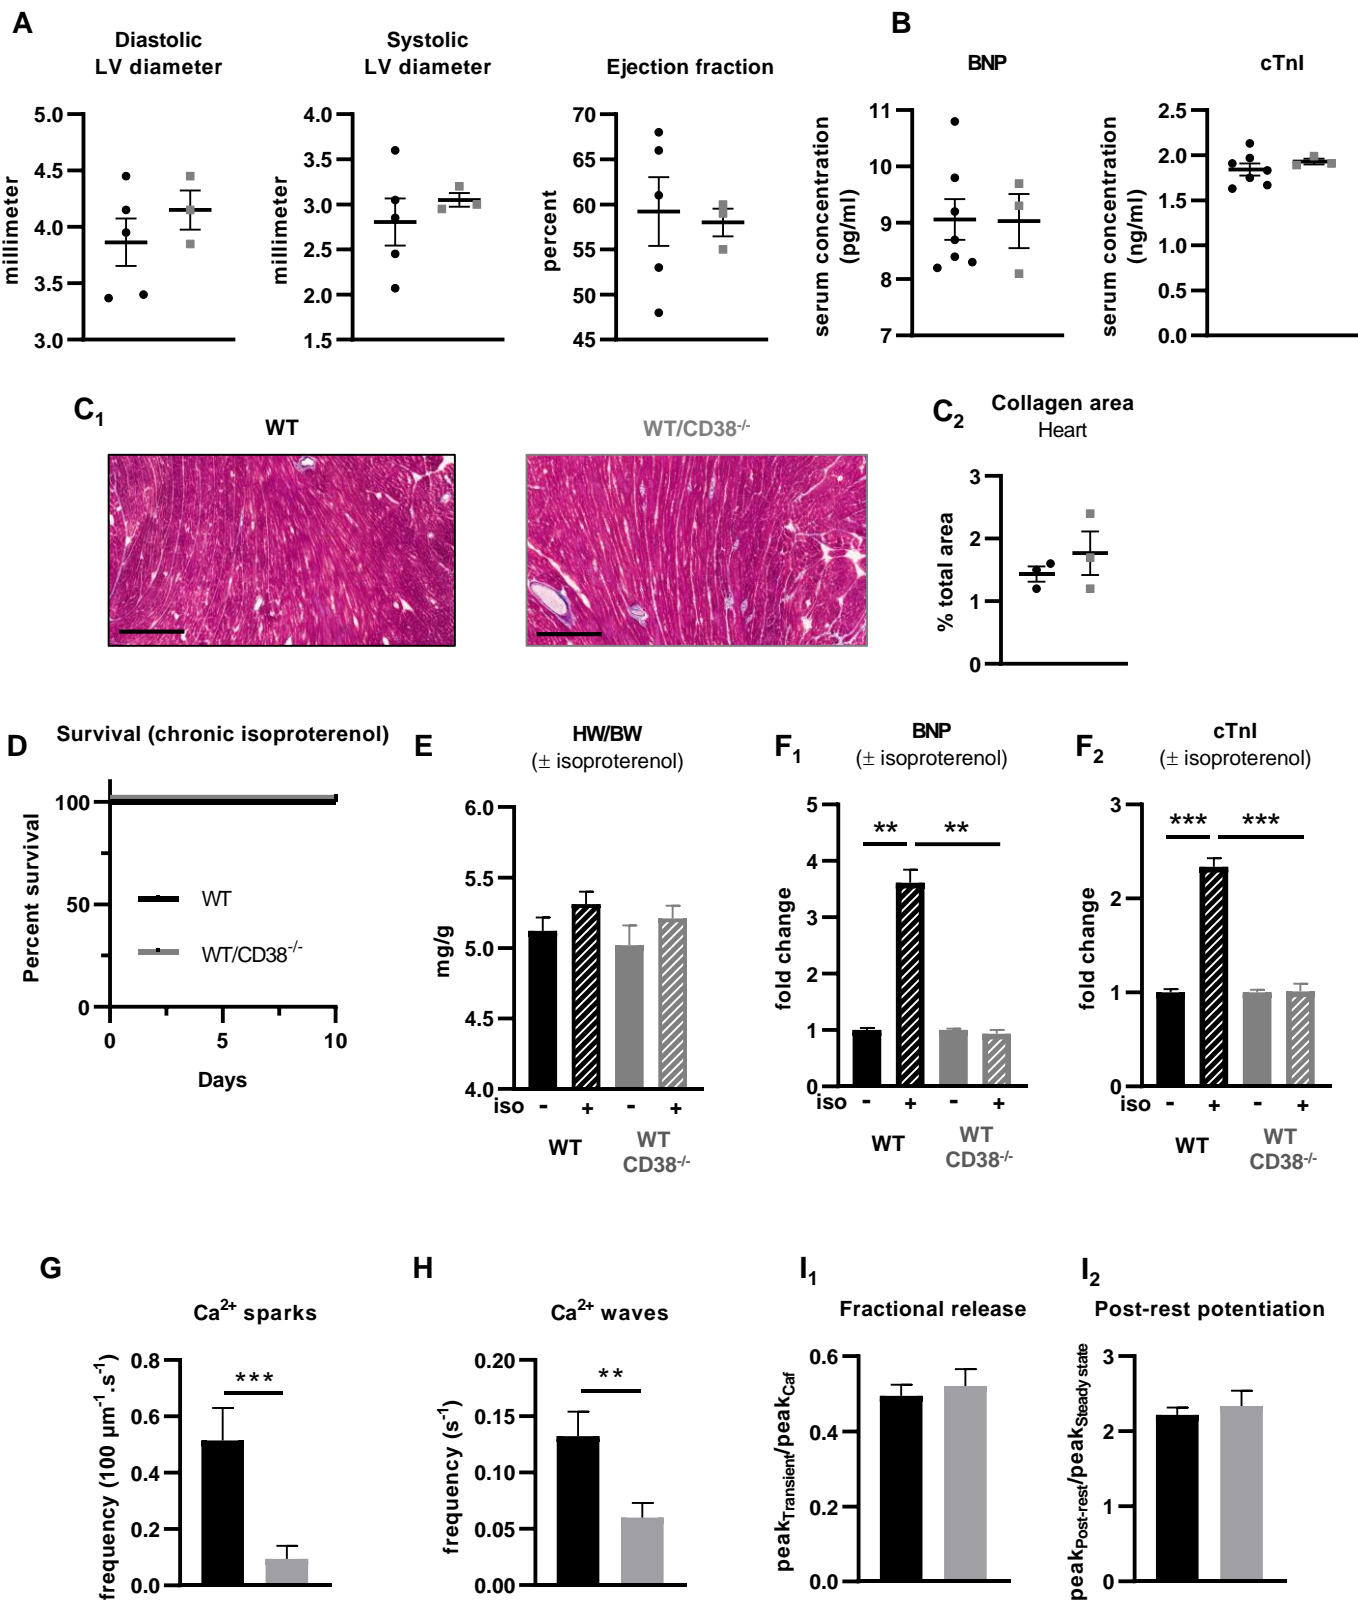

Appendix Figure S3

### Appendix Figure S3. Cardiac function of WT and *WT/CD38<sup>-/-</sup>* mice.

- A** Cardiac function evaluated by echocardiography in WT (n=5) and *WT/CD38<sup>-/-</sup>* (n=3) mice. The dot plots show the main cardiac parameters: the left ventricular (LV) diastolic and systolic inner diameters and LV ejection fraction.
- B** Plasma levels of cardiac stress biomarkers: brain natriuretic peptide (BNP) and cardiac troponin I (cTnI) of WT (n=7) and *WT/CD38<sup>-/-</sup>* (n=3) hearts. No sign of cardiac stress was seen in *WT/CD38<sup>-/-</sup>* mice.
- C1, C2** Images showing the absence of fibrosis in heart from WT and *WT/CD38<sup>-/-</sup>* mice, evaluated by Masson's trichrome staining of collagen (blue) on cross-sections (**C1**), . Scale bars: 300  $\mu$ m. (**C2**) quantification of collagen staining area (% total area) in the heart of WT and *WT/CD38<sup>-/-</sup>* mice (n=3 mice per group).
- D** Isoproterenol-induced heart failure. The Kaplan–Meier curve shows the survival rate of WT (n=6) and *WT/CD38<sup>-/-</sup>* (n=7) mice following isoproterenol subcutaneous injection at 2.5 mg/kg/d for 10 days.
- E** Histogram showing isoproterenol-induced heart hypertrophy in WT and *WT/CD38<sup>-/-</sup>* mice, expressed as heart weight/body weight ratio (HW/BW). At such low isoproterenol concentration, no significant hypertrophy was observed. NaCl groups: n=6 WT, n=8 *WT/CD38<sup>-/-</sup>*; isoproterenol groups: n=6 WT, n=7 *WT/CD38<sup>-/-</sup>* mice.
- F** Plasma levels of cardiac stress biomarkers after isoproterenol subcutaneous injection at 2.5 mg/kg/d during 10 days in WT and *WT/CD38<sup>-/-</sup>* mice: isoproterenol-induced an increase of brain natriuretic peptide (BNP)(**F1**) and of cardiac troponin I (cTnI) (**F2**) levels in WT mice whereas these markers levels were unchanged in *WT/CD38<sup>-/-</sup>* mice after isoproterenol treatment. NaCl groups: n=5 WT, n=5 *WT/CD38<sup>-/-</sup>*; isoproterenol groups: n=5 WT, n=7 *WT/CD38<sup>-/-</sup>* mice.
- G, H** Bar graphs showing the averaged  $\text{Ca}^{2+}$  sparks (**G**) and waves (**H**) frequencies in cardiomyocytes isolated from WT (n=21 cells) and *WT/CD38<sup>-/-</sup>* (n=41 cells) mice.
- I** Bar graphs showing the fractional release (**I1**) and the post-rest potentiation (**I2**) in cardiomyocytes from WT (n=29 cells) and *WT/CD38<sup>-/-</sup>* (n=28 cells) mice. These parameters were calculated as described in the method section.

**Data information:** Each dot of the graphs represents a mouse. **A,B,F** in duplicate; **D,E** one value/mouse; **C** in triplicate. After normality and variance comparison tests, significance was assessed using: **A, B, C2, F1, G, H, I1:** Mann-Whitney test; **D:** Log-rank (Mantel-Cox) and Gehan-Breslow-Wilcoxon tests; **E:** ANOVA; **F2:** ANOVA followed by unpaired Student's t-tests; **I2:** unpaired Student's t-test with Welch's correction. Values are expressed as means  $\pm$  SEM. Significance: \*p<0.05, \*\*p<0.01, \*\*\*p<0.001.

■ WT    ■ WT/CD38<sup>-/-</sup>

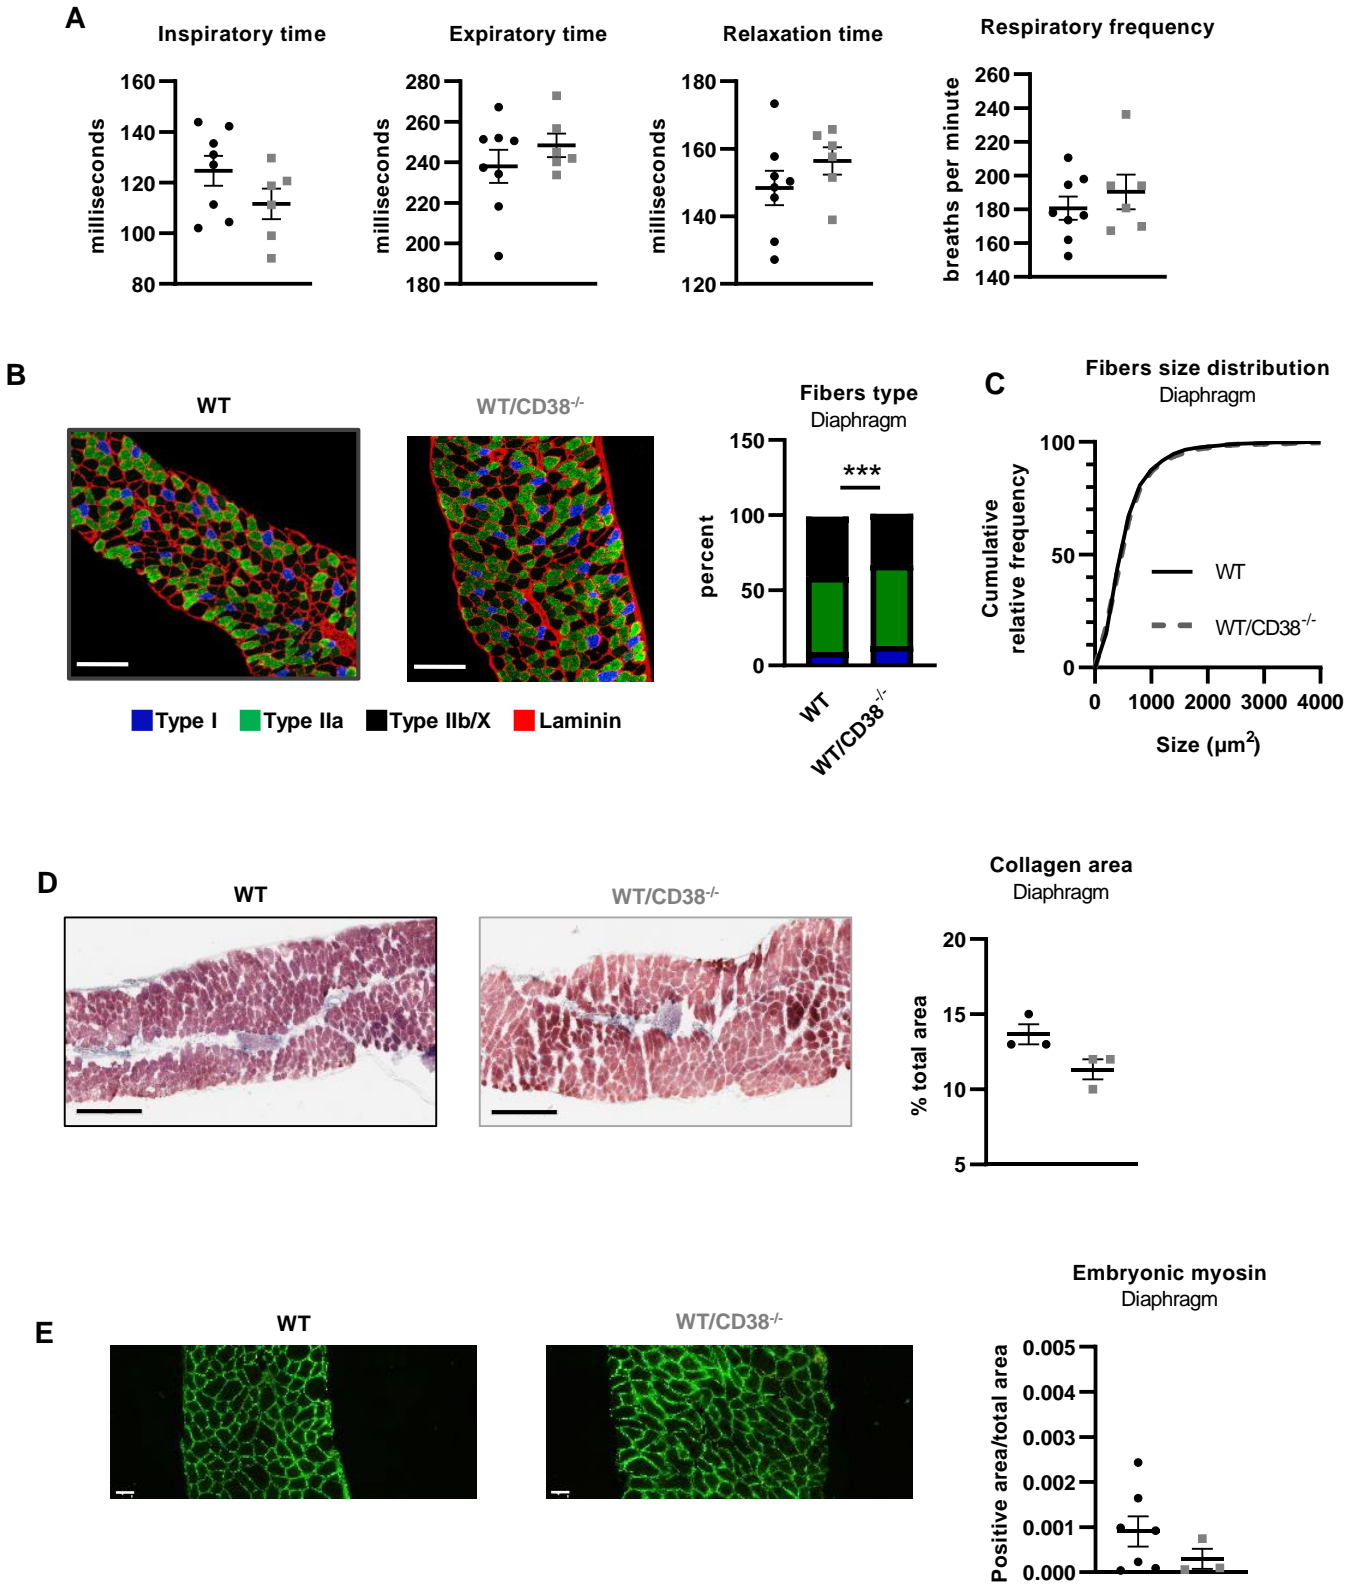

Appendix Figure S4



**Appendix Figure S4. Respiratory function and diaphragm structure of WT and *WT/CD38<sup>-/-</sup>* mice.**

- A** Measurement of the ventilatory mechanic parameters by barometric plethysmography: dot plots showing inspiratory (Ti), expiratory (Te) and relaxation times and the respiratory frequency, in WT (n=8) and *WT/CD38<sup>-/-</sup>* mice (n=6).
- B** Muscle fiber typology: images showing the immunostaining of slow MyHC (Type I) fiber, fast MyHCs (Type IIa and IIb/X) fibers, along with laminin (red) on transverse cross-sections from diaphragms of WT and *WT/CD38<sup>-/-</sup>* mice. Scale bars: 100  $\mu$ m. Histogram: percentage of fiber type (I, IIa, IIb/x) in diaphragm of WT and *WT/CD38<sup>-/-</sup>* mice (n=7, n= 3 mice respectively per group).
- C** Fibers size distribution in diaphragm of WT and *WT/CD38<sup>-/-</sup>* mice (n=7, n=3 mice respectively per group).
- D** Left panel: images showing the absence of fibrosis, evaluated by Masson's trichrome staining of collagen (blue), on transverse cross-sections of diaphragm from WT and *WT/CD38<sup>-/-</sup>* mice. Scale bars: 300  $\mu$ m. Right panel: quantification of collagen staining area (% total area) in the diaphragm of WT and *WT/CD38<sup>-/-</sup>* mice (n=3 per group).
- E** Left panel: images showing the absence of fibers expressing embryonic myosin evaluated by immunostaining along with laminin (green) on transverse cross-sections from diaphragms of WT and *WT/CD38<sup>-/-</sup>* mice. Scale bars 50  $\mu$ m. Right panel: quantification of fibers expressing the embryonic myosin in diaphragms of WT (n=3) and *WT/CD38<sup>-/-</sup>* (n=3) mice. The results are expressed by calculating the ratio of positive embryonic myosin fibers area/total area.

**Data information:** Each dot of the graphs represents a mouse. **A,B,C,E** one value/mouse, **D** in duplicate. After normality and variance comparison tests, significance was assessed using: **A:** unpaired Student's t-test; **B:** Chi-square test; **C:** Kolmogorov-Smirnov test, **D,E:** Mann-Whitney test. Values are expressed as means  $\pm$  SEM. Significance: \*p<0.05, \*\*p<0.01, \*\*\*p<0.001.

■ WT    ■ WT/CD38<sup>-/-</sup>

**A**

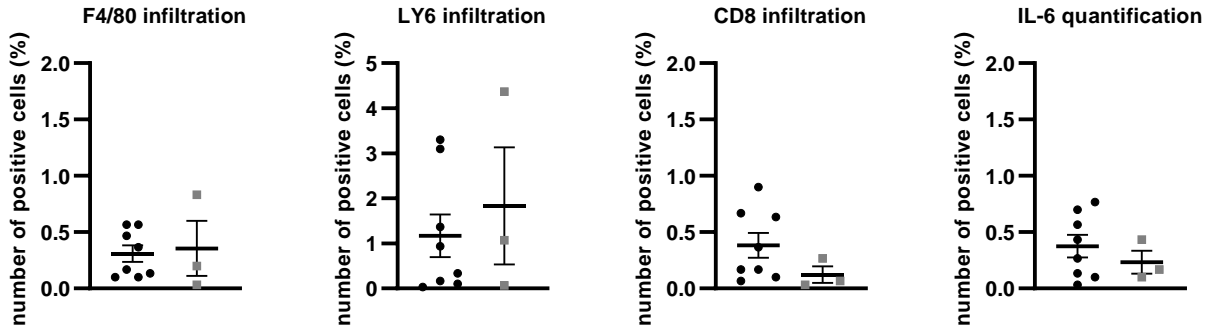

**B**

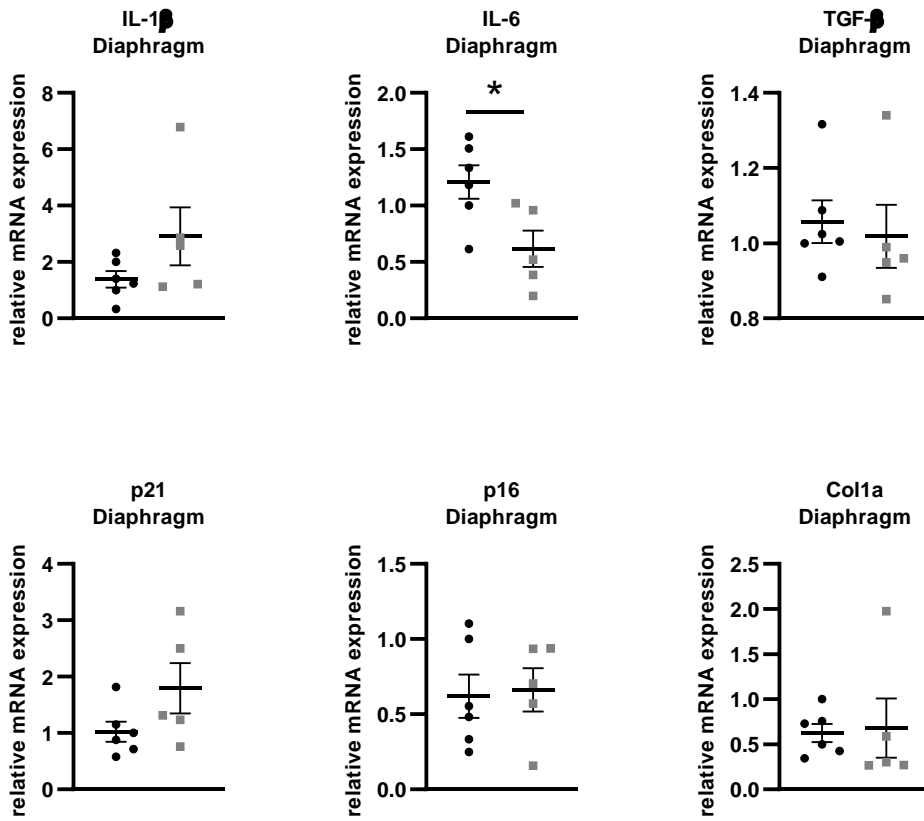

**Appendix Figure S5. Deletion of CD38 has no effect on cell infiltrations and inflammation markers in diaphragm of WT/*CD38*<sup>-/-</sup> mice.**

- A** Dot plots showing the percentage of various infiltration markers in diaphragms from WT (n=8) and *WT/CD38*<sup>-/-</sup> (n=3) mice, evaluated by immunostaining of myeloid cells. F4/80 represents macrophages, Ly-6G/6C monocytes, granulocytes and neutrophils, CD8 cytotoxic T-lymphocytes, and IL-6 positive cells.
- B** Dot plots showing qPCR analysis of mRNA expression levels of cytokine interleukin-1beta (IL-1 $\beta$ ) and -6 (IL-6), transforming growth factor-beta (TGF- $\beta$ ), cyclin-dependent kinase inhibitor 1 (p21) and senescence markers (cell-cycle inhibitor p16, INK4a), Col1A1 (Collagen Type I Alpha 1 Chain) in diaphragms of WT (n=6) and *WT/CD38*<sup>-/-</sup> (n=5) mice.

**Data information: A,B** Each dot of the graphs represents a mouse. **A** one value/mouse; **B** in duplicate. After normality and variance comparison tests, significance was assessed using: **A**: Mann-Whitney test; **B**: unpaired Student's t-test excepted for Col1a1 : Mann-Whitney test. Values are expressed as means  $\pm$  SEM. Significance: \*p<0.05, \*\*p<0.01, \*\*\*p<0.001.

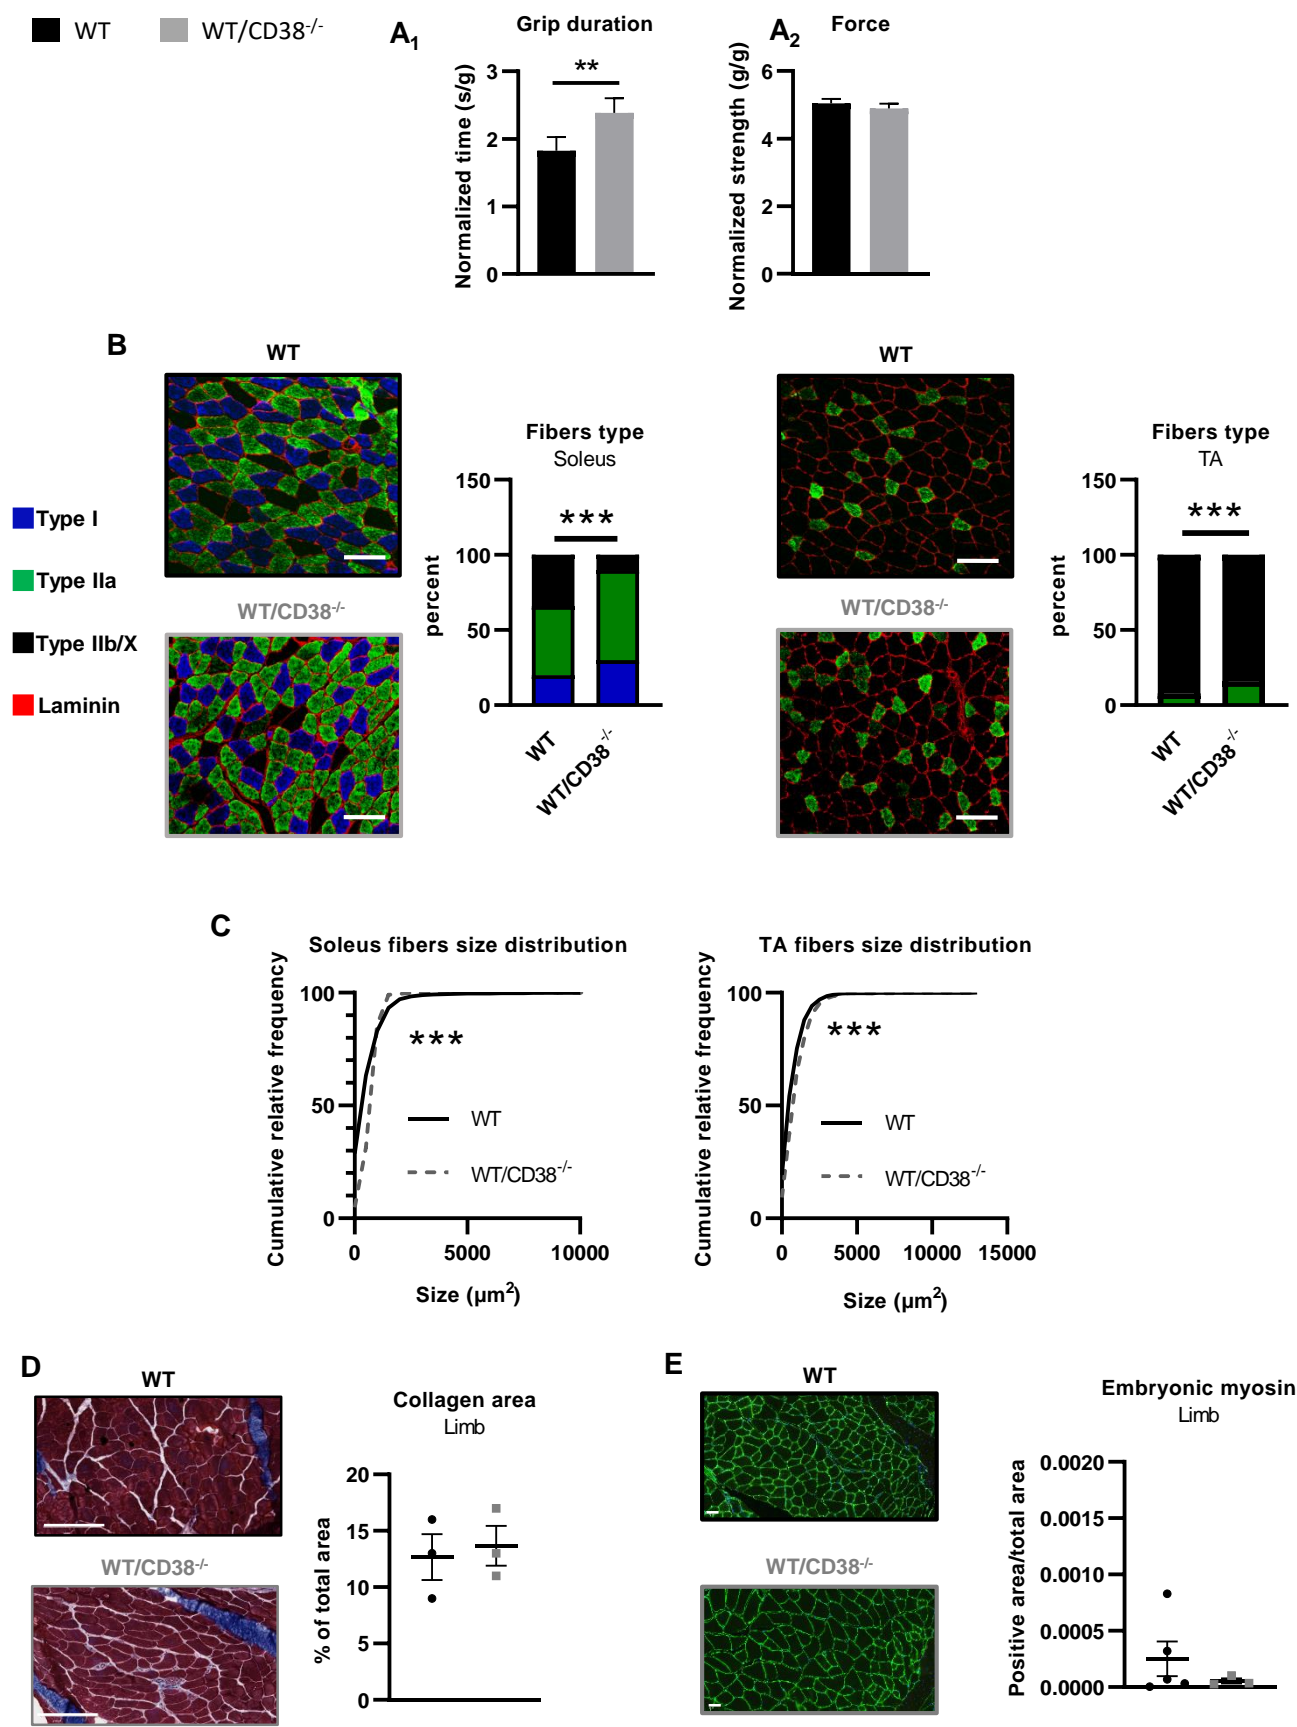

**Appendix Figure S6**

**Appendix Figure S6. Effect of CD38 deletion on skeletal muscle structure and function in *WT/CD38<sup>-/-</sup>* mice.**

- A** Histograms showing the grip duration (latency to fall) (**A<sub>1</sub>**) and the limb maximum (max) (**A<sub>2</sub>**) force measured in a grip test in WT (n=89) and *WT/CD38<sup>-/-</sup>* (n=67) mice (age: 9-26 months).
- B** Muscle fiber typology revealed by immunostaining showing the localization of slow MyHC (Type I), and fast MyHCs (Type IIa and IIb/X) fibers, along with laminin (red) on transverse cross-sections from *soleus* and tibialis (TA) of WT and *WT/CD38<sup>-/-</sup>* mice. Scale bars: 100  $\mu$ m. Histogram showing the percentage of fibers type distribution in the *soleus* and TA of WT and *WT/CD38<sup>-/-</sup>* mice (n=5, n=3, respectively).
- C** Fibers size distribution in the *soleus* and the TA of WT and *WT/CD38<sup>-/-</sup>* mice (n=5, n=3, respectively).
- D** Left panel: images showing the absence of fibrosis, evaluated by Masson's trichrome staining of collagen (blue), on limb transverse cross-sections of WT and *WT/CD38<sup>-/-</sup>* mice. Right panel: quantification of collagen staining area in limb of WT and *WT/CD38<sup>-/-</sup>* mice (n=3 per group). Scale bars: 300  $\mu$ m.
- E** Left panel: images showing the absence of fibers expressing embryonic myosin evaluated by immunostaining along with laminin (green) on limb transverse cross-sections of WT and *WT/CD38<sup>-/-</sup>* mice. Scale bars: 50  $\mu$ m. Right panel: area of fibers expressing the embryonic myosin in limb of WT (n=5) and *WT/CD38<sup>-/-</sup>* (n=3) mice.

**Data information:** Each dot of the graphs represents a mouse. **A<sub>1</sub>,B,C,E** one value/mouse, **A<sub>2</sub>,D** in triplicate, After normality and variance comparison tests, significance was assessed using: **A, D, E:** Mann-Whitney test); **B:** Chi-square test; **C:** Kolmogorov-Smirnov test. Values are expressed as means  $\pm$  SEM. Significance: \*p<0.05, \*\*p<0.01, \*\*\*p<0.001.

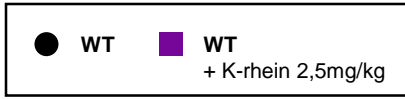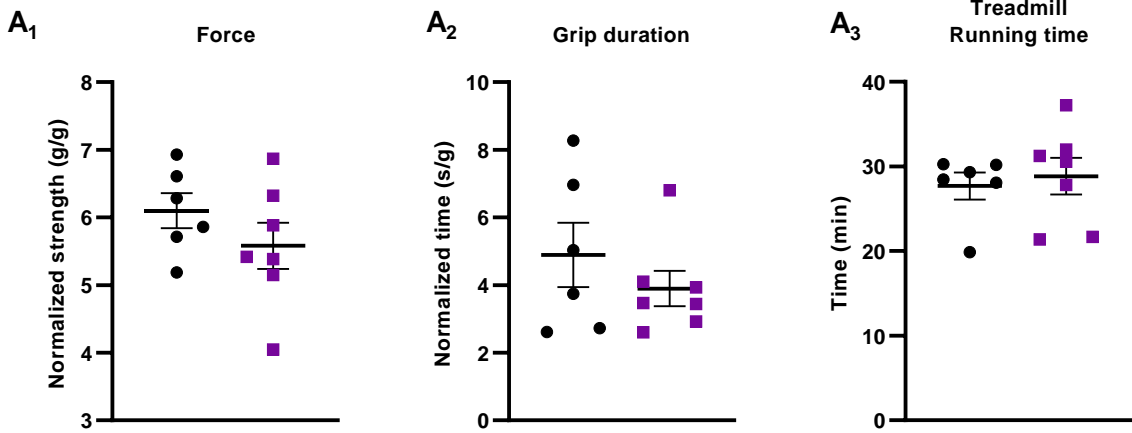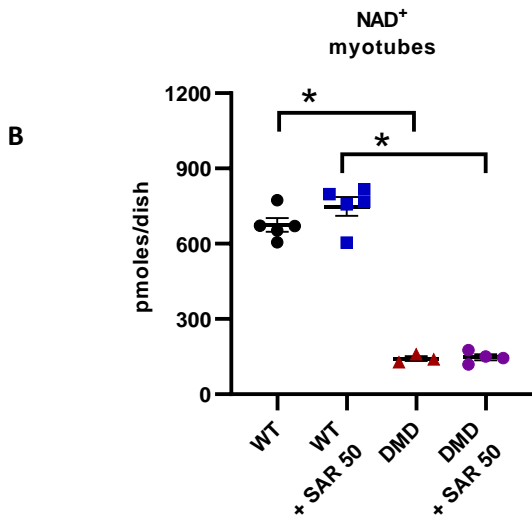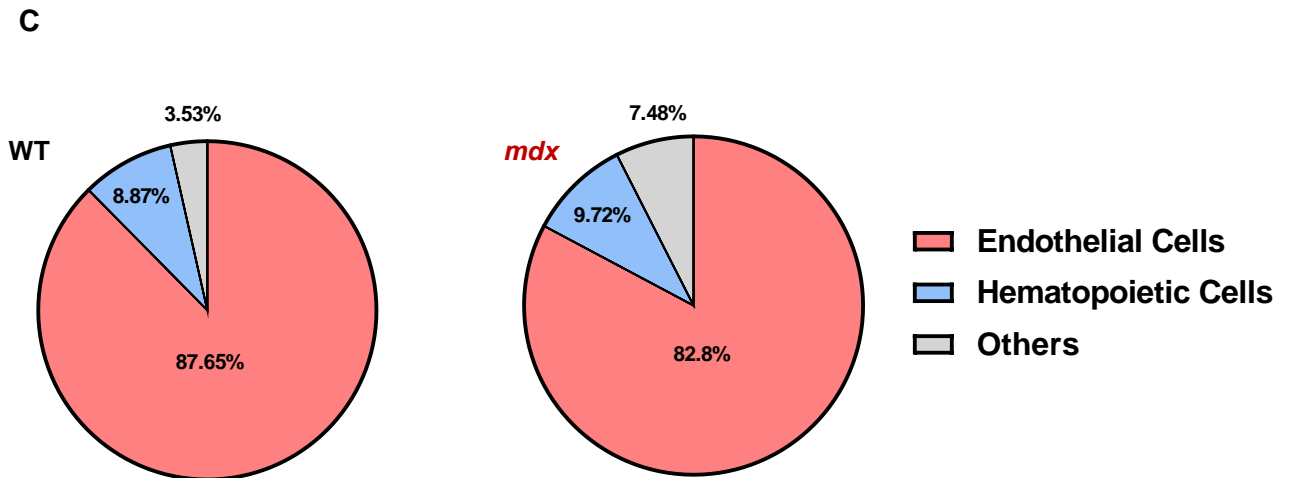

Appendix Figure S7

**Appendix Figure S7. Pharmacological effects on CD38 inhibitors on WT mice and human myotubes. Cellular distribution of CD38 in *mdx* mice.**

- A. Dot plots showing measurement of the grip duration (**A<sub>1</sub>**), the force (**A<sub>2</sub>**) and the treadmill (**A<sub>3</sub>**) performances of WT (n=6) and K-rhein-treated WT (n=7) mice.
- B. NAD<sup>+</sup> levels in human healthy myotubes and DMD myotubes untreated and treated by SAR650984 (isatuximab) for 48 hours. Healthy myotubes untreated (n=5 dishes) and treated (n=5 dishes) by SAR650984, DMD myotubes untreated (n=3 dishes) and treated (n=4 dishes) by SAR650984.
- C. Pie chart representation of flow cytometry analysis of surface CD38 expression in endothelial (CD31) and hematopoietic cells (CD45) in heart tissue of 16-month-old WT and *mdx* mice (n=3 mice per group).

**Data information:** Each dot of the graphs represents a mouse. **A<sub>1</sub>** in triplicate; **A<sub>2</sub>,A<sub>3</sub>**, one value/mouse; **C** in duplicate. After normality and variance comparison tests, significance was assessed using: **A<sub>1</sub>**: unpaired Student's t-test; **A<sub>2-3</sub>, B, C**: Mann-Whitney test. Values are expressed as means  $\pm$  SEM. Significance: \*p<0.05, \*\*p<0.01, \*\*\*p<0.001.

**A**

| Lesion incidence summary                                      |            |                         |
|---------------------------------------------------------------|------------|-------------------------|
|                                                               | <i>mdx</i> | <i>mdx</i> +<br>K-rhein |
|                                                               | N=9        | N=10                    |
| Liver                                                         |            |                         |
| mixed inflammatory cell infiltrates,<br>minimal in all mice : |            |                         |
| without cell death                                            | 7          | 8                       |
| with cell death                                               | 2          | 2                       |
| Kidney                                                        |            |                         |
| hyalin casts, minimal                                         | 5          | 2                       |
| glomerular changes, minimal                                   | 3          | 1                       |
| interstitial fibrosis, multifocal, mild                       | 8          | 8                       |

**B**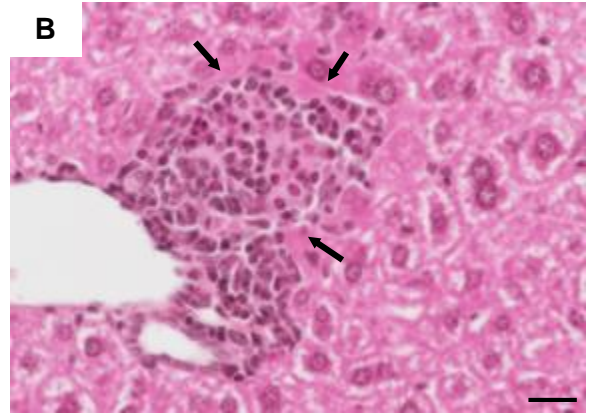**C**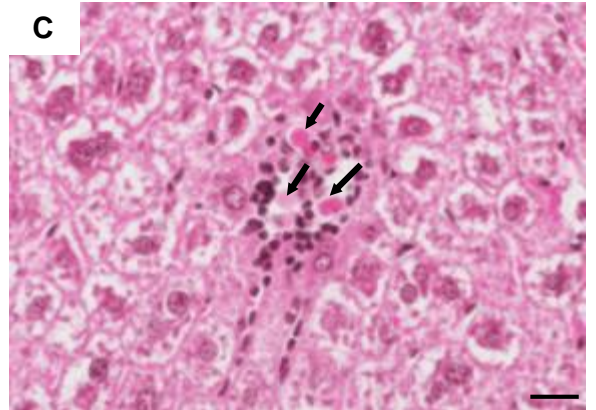**D**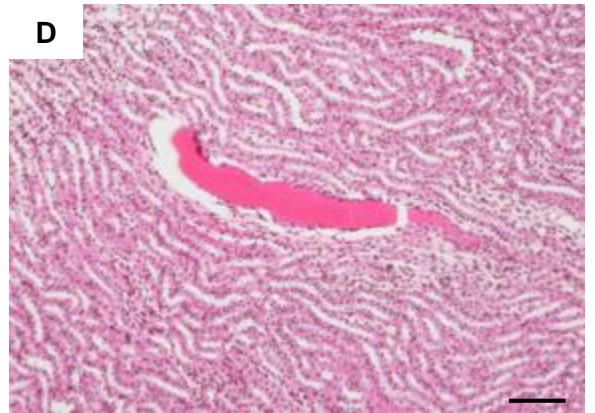



**Appendix Figure S8. Histological evaluation of systemic toxicity of K-rhein in *mdx* mice treated for 5 weeks (5mg/kg/d). Staining was performed with the saffron eosin hemalun method.**

- A** Table of lesion incidence presenting key histopathological findings and their incidence in K-rhein-treated *mdx* mice and control (NaCl 0,9%) *mdx* mice.
- B** Illustration of some key histopathological findings in the liver and kidney of K-rhein-treated *mdx* mice and untreated *mdx* mice. **(B)** Minimal focal mixed inflammation cell infiltration of a K-rhein treated *mdx* mouse. Small number of similar inflammation cell infiltration foci was observed scattered in the hepatic parenchyma (arrow). Hemalun-eosin-saffron stain. Scale bar: 20  $\mu$ m. **(C)** Minimal focal mixed inflammation cell infiltration (arrows) in the liver of a untreated *mdx* mouse. Small number of lesions was observed scattered in the hepatic parenchyma. Hemalun-eosin-saffron stain. Scale bar: 20  $\mu$ m. **(D)** Hyaline cast in the tubular lumen in the renal medulla of a K-rhein treated *mdx* mouse. Hemalun-eosin-saffron stain (Scale bar: 100  $\mu$ m).
